# Supplementary material for: Up in the air: Threats to Afromontane biodiversity from climate change and habitat loss revealed by genetic monitoring of the Ethiopian Highlands bat
Source: PubMed Central journal article supplement (PMC7980307; doi:10.1111/eva.13161), 2020-12-07
Supplement: EVA-14-794-s002.pdf [file EVA-14-794-s002.pdf]

## **Appendix B – Supporting Tables and Figures**

**Up in the air: threats to Afromontane biodiversity from climate change and habitat loss revealed by genetic monitoring of the Ethiopian Highlands bat**

**Table S1** – List of sample collection locations, their associated population and number of males and females caught in each site.

| Mountain range   | Population | Location                   | Habitat                | Latitude | Longitude | Altitude<br>(m) | Date       | Males | Female | Total |
|------------------|------------|----------------------------|------------------------|----------|-----------|-----------------|------------|-------|--------|-------|
| Bale Mountains   | Bale-D     | Dinsho                     | Juniper forest         | 7.09445  | 39.79046  | 3195            | Oct 2014   | 3     | 1      | 4     |
| Bale Mountains   | Bale-D     | Gesse forest, Dinsho       | Juniper forest         | 7.10681  | 39.73461  | 3237            | Oct 2014   | 2     | 0      | 2     |
| Bale Mountains   | Bale-D     | Gesse forest, Dinsho       | Juniper forest         | 7.10544  | 39.73736  | 3237            | Oct 2014   | 1     | 0      | 1     |
| Bale Mountains   |            | Harena forest, Rira        | Afromontane forest     | 6.75296  | 39.71883  | 2795            | Oct 2014   | 1     | 1      | 2     |
| Bale Mountains   |            | Harena forest, Rira        | Afromontane forest     | 6.75229  | 39.71394  | 2800            | Oct 2014   | 0     | 1      | 1     |
| Bale Mountains   | Bale-S     | Sanetti Plateau, campsite  | Afroalpine grasslands  | 6.85594  | 39.88123  | 4007            | Oct 2014   | 2     | 0      | 2     |
| Bale Mountains   | Bale-S     | Sanetti Plateau, Red cliff | Afroalpine grasslands  | 6.80448  | 39.80022  | 3918            | Oct 2014   | 7     | 0      | 7     |
| Chilallo-Galame  |            | Asella, Arsi               | Juniper forest /arable | 7.95669  | 39.18901  | 2954            | Oct 2014   | 2     | 0      | 2     |
| Chilallo-Galame  |            | Western slopes, Arsi       | Juniper forest /arable | 7.93639  | 39.19770  | 3165            | Dec 2015   | 1     | 0      | 1     |
| Simien Mountains | Simien     | Chenoke camp               | Afroalpine grasslands  | 13.26377 | 38.20847  | 3949            | April 2015 | 1     | 0      | 1     |
| Simien Mountains | Simien     | Chenoke camp               | Afroalpine grasslands  | 13.22337 | 38.22074  | 4224            | April 2015 | 1     | 0      | 1     |
| Simien Mountains | Simien     | Sankaber camp              | Erica forest           | 13.23111 | 38.03075  | 3192            | April 2015 | 4     | 6      | 10    |
| Abune-Yosef      | Abune      | Abune Yosef, cliff camp    | Afroalpine grasslands  | 12.14512 | 39.17923  | 4155            | April 2015 | 2     | 0      | 2     |
| Abune-Yosef      | Abune      | Abune Yosef, Zigit         | Afroalpine grasslands  | 12.15794 | 39.15246  | 3773            | April 2015 | 1     | 0      | 1     |
| Abune-Yosef      | Abune      | Abune Yosef, pass          | Afroalpine grasslands  | 12.15323 | 39.15316  | 3849            | April 2015 | 6     | 0      | 6     |
| Guassa           | Guassa     | Guassa CCA, lodge1         | Erica forest           | 10.31139 | 39.80500  | 3492            | Sep 2015   | 1     | 0      | 1     |
| Guassa           | Guassa     | Guassa CCA, lodge2         | Erica forest           | 10.30278 | 39.80861  | 3378            | Sep 2015   | 1     | 0      | 1     |
| Guassa           | Guassa     | Guassa CCA, Legora         | Afromontane grass      | 10.40806 | 39.80717  | 3150            | Sep 2015   | 1     | 1      | 2     |
| Guassa           | Guassa     | Guassa CCA, pass           | Afromontane grass      | 10.40805 | 39.80722  | 3358            | Sep 2015   | 2     | 1      | 3     |
| <b>TOTAL</b>     |            |                            |                        |          |           |                 |            | 39    | 11     | 50    |

**Table S2** – List of variables included in the final full *Plecotus balensis* ecological niche model and their percent contribution to the model. Asterix mark variables included in the climatic models.

| <b>Variable</b>             | <b>Source</b>                                                                                                                  | <b>Contribution to model</b> |
|-----------------------------|--------------------------------------------------------------------------------------------------------------------------------|------------------------------|
| Maximum temperature (BIO5)* | WorldClim ( <a href="http://www.worldclim.org/">www.worldclim.org/</a> )                                                       | 57.1%                        |
| Ecoregions                  | WWF (Olson et al. 2001)                                                                                                        | 33.4%                        |
| Topographic ruggedness*     | SRTM map ( <a href="http://www2.jpl.nasa.gov/srtm/">www2.jpl.nasa.gov/srtm/</a> )                                              | 6.7%                         |
| Land cover                  | GlobCover2009 map<br>( <a href="http://due.esrin.esa.int/page_globcover.php">http://due.esrin.esa.int/page_globcover.php</a> ) | 2.8%                         |

**Table S3** – Landscape variables included in the landscape genetics analysis with their source maps, effect on movement, with justification in brackets, and assigned resistance costs.

| <b>Variable</b>        | <b>Source</b>                         | <b>Effect on movement [justification]</b>                                                             | <b>Resistance costs</b>                                                                                                                                  |
|------------------------|---------------------------------------|-------------------------------------------------------------------------------------------------------|----------------------------------------------------------------------------------------------------------------------------------------------------------|
| Altitude               | SRTM map<br>(www2.jpl.nasa.gov/srtm/) | Resistance to movement decreases with altitude [only found in high altitudes – above 3000 masl]       | 1-100 (high-low altitudes)                                                                                                                               |
| Altitude 10q           | SRTM map<br>(www2.jpl.nasa.gov/srtm/) | Resistance decreases with altitude                                                                    | 10 categories classified based on 10 quantiles (costs increase in 10 intervals)                                                                          |
| Altitude 10g           | SRTM map<br>(www2.jpl.nasa.gov/srtm/) | Resistance decreases with altitude                                                                    | 10 categories classified based on geometric intervals (costs increase in 10 intervals)                                                                   |
| Altitude 3 a/b/c       | SRTM map<br>(www2.jpl.nasa.gov/srtm/) | No resistance at altitudes where found, maximum resistance at Rift Valley altitudes                   | 3 categories:<br>> 3000m = 1<br>2000-3000m = 10 / 20 / 50<br>< 2000m = 100                                                                               |
| Topographic ruggedness | SRTM map<br>(www2.jpl.nasa.gov/srtm/) | Resistance decreases with ruggedness [found in areas with high topographic ruggedness – based on ENM] | 1-100 (high-low ruggedness)                                                                                                                              |
| Ruggedness 10q         | SRTM map<br>(www2.jpl.nasa.gov/srtm/) | Resistance decreases with ruggedness                                                                  | 10 categories classified based on 10 quantiles (costs increase in 10 intervals)                                                                          |
| Ruggedness 10g         | SRTM map<br>(www2.jpl.nasa.gov/srtm/) | Resistance decreases with ruggedness                                                                  | 10 categories classified based on geometric intervals (costs increase in 10 intervals)                                                                   |
| Ecoregions 4           | WWF (Olson et al. 2001)               | High resistance to movement in non-montane ecoregions [only found in montane habitats]                | 4 categories:<br>Et mont moorland = 1<br>Et mont grass/wood = 1<br>Et mont forest = 10<br>all the rest = 100                                             |
| Ecoregions 5           | WWF (Olson et al. 2001)               | Higher resistance to movement in non-montane ecoregions                                               | 5 categories:<br>Et mont moorland = 1<br>Et mont grass/wood = 10<br>Et mont forest = 20<br>Som mont wood = 50<br>wood/savanna = 70<br>all the rest = 100 |

| <b>Variable</b>         | <b>Source</b>                                                                                                                                                                                 | <b>Effect on movement [justification]</b>                                                                                                                   | <b>Resistance costs</b>                                                                                                                                           |
|-------------------------|-----------------------------------------------------------------------------------------------------------------------------------------------------------------------------------------------|-------------------------------------------------------------------------------------------------------------------------------------------------------------|-------------------------------------------------------------------------------------------------------------------------------------------------------------------|
| Ecoregions 6            | WWF (Olson et al. 2001)                                                                                                                                                                       | Higher resistance to movement in non-montane ecoregions                                                                                                     | 6 categories:<br>Et mont moorland = 1<br>Et mont grass/wood = 1<br>Et mont forest = 10<br>Som mont wood = 20<br>wood = 30<br>savannah = 50<br>all the rest = 100  |
| Ecoregions 7            | WWF (Olson et al. 2001)                                                                                                                                                                       | Higher resistance to movement in non-montane ecoregions                                                                                                     | 6 categories:<br>Et mont moorland = 1<br>Et mont grass/wood = 10<br>Et mont forest = 20<br>Som mont wood = 30<br>wood = 40<br>savannah = 60<br>all the rest = 100 |
| Vegetation cover (NDVI) | MOD13A3 ( <a href="https://lpdaac.usgs.gov/">https://lpdaac.usgs.gov/</a> )                                                                                                                   | Resistance to movement decreases with dry season vegetation cover [slow flying bat will likely require vegetation cover to hide from predators when flying] | 1-100 (high-low NDVI)                                                                                                                                             |
| Land cover 4            | GlobCover2009 map ( <a href="http://due.esrin.esa.int/page_globcover.php">http://due.esrin.esa.int/page_globcover.php</a> )                                                                   | Resistance to movement increases with anthropogenic impact [categories defined based on areas where the species was successfully captured]                  | 4 categories:<br>forest / mosaic forest-grass = 1<br>mosaic crop-forest = 10<br>shrub / grass / crop = 50<br>urban / barren = 100                                 |
| Land cover 7            | GlobCover2009 map ( <a href="http://due.esrin.esa.int/page_globcover.php">http://due.esrin.esa.int/page_globcover.php</a> )                                                                   | Resistance to movement increases with anthropogenic impact                                                                                                  | 7 categories:<br>mosaic forest-grass = 1<br>forest = 10<br>shrub = 20<br>mosaic crop-forest = 30<br>grass / crop = 60<br>water = 70<br>urban / barren = 100       |
| Percent tree cover      | ( <a href="https://earthenginepartners.appspot.com/science-2013-global-forest/download_v1.2.html">https://earthenginepartners.appspot.com/science-2013-global-forest/download_v1.2.html</a> ) | Resistance to movement decreases with tree cover [Slow flying bats - trees provide cover from predators when flying]                                        | 1-100 (high-low tree cover)                                                                                                                                       |

| <b>Variable</b>            | <b>Source</b>                                                                                                                                                                                                                   | <b>Effect on movement [justification]</b>                                                                                                                             | <b>Resistance costs</b>                                                             |
|----------------------------|---------------------------------------------------------------------------------------------------------------------------------------------------------------------------------------------------------------------------------|-----------------------------------------------------------------------------------------------------------------------------------------------------------------------|-------------------------------------------------------------------------------------|
| Percent tree cover 3 a/b/c | ( <a href="https://earthenginepartners.appspot.com/science-2013-global-forest/download_v1.2.html">https://earthenginepartners.appspot.com/science-2013-global-forest/download_v1.2.html</a> )                                   | Resistance to movement increases when tree cover very low                                                                                                             | 3 categories:<br>51-99% cover = 1<br>16-50% cover = 10/ 20/ 50<br>0-15% cover = 100 |
| Distance to streams        | ESRI<br>( <a href="http://www.arcgis.com/home/item.html?id=273980c20bc74f94ac96c7892ec15aff">www.arcgis.com/home/item.html?id=273980c20bc74f94ac96c7892ec15aff</a> )                                                            | Resistance to movement increases with distance to permanent streams [These streams will have gallery forests, which will facilitate movement]                         | 1-100 (low-high distance from streams)                                              |
| Distance to streams 2 a/b  | ESRI<br>( <a href="http://www.arcgis.com/home/item.html?id=273980c20bc74f94ac96c7892ec15aff">www.arcgis.com/home/item.html?id=273980c20bc74f94ac96c7892ec15aff</a> )                                                            | Resistance to movement increases with distance to permanent streams beyond likely gallery forest strip size                                                           | 2 categories:<br>0 – 1 / 5 km = 1<br>> 1 / 5 km = 100                               |
| Human footprint            | Global human footprint v2 (2005), NASA<br>( <a href="http://sedac.ciesin.columbia.edu/data/set/wildareas-v2-human-footprint-geographic">http://sedac.ciesin.columbia.edu/data/set/wildareas-v2-human-footprint-geographic</a> ) | Resistance to movement increases with anthropogenic impact [These bats are not known to be found in urban area, and instead are associated with undisturbed habitats] | 1-100 (low-high human footprint)                                                    |
| Night light                | Night light development index (2006), NOAA<br>( <a href="https://ngdc.noaa.gov/eog/dmsp/download_ndi.html">https://ngdc.noaa.gov/eog/dmsp/download_ndi.html</a> )                                                               | Resistance to movement increases with anthropogenic impact                                                                                                            | 1-100 (low-high night lights)                                                       |
| Night light 10             | Night light development index (2006), NOAA<br>( <a href="https://ngdc.noaa.gov/eog/dmsp/download_ndi.html">https://ngdc.noaa.gov/eog/dmsp/download_ndi.html</a> )                                                               | Resistance to movement increases with anthropogenic impact                                                                                                            | 10 categories classified based on 10 quantiles (costs increase in 10 intervals)     |

**Table S4** – Results of MRDM tests to select the best combination of resistance costs for each variable group (hypothesis tested in the landscape genetic analysis) based on their relationship with genetic differentiation ( $F_{ST}$  or Jost's D) between *Plecotus balensis* populations. Selected variables are highlighted in green (for  $F_{ST}$ ) or blue (for Jost's D).

| Variable group | Layer               | $F_{ST}$ |        |        | Jost's D |        |       |
|----------------|---------------------|----------|--------|--------|----------|--------|-------|
|                |                     | $R^2$    | F      | P      | $R^2$    | F      | P     |
| Topographic    | Abrupt              | 0.566    | 10.431 | 0.017  | 0.585    | 11.289 | 0.016 |
| Topographic    | Abrupt 10g          | 0.349    | 4.283  | 0.114  | 0.368    | 4.66   | 0.066 |
| Topographic    | Abrupt 10q          | 0.217    | 2.224  | 0.132  | 0.248    | 2.644  | 0.104 |
| Topographic    | Altitude            | 0.766    | 26.267 | 0.017  | 0.733    | 21.966 | 0.017 |
| Topographic    | Altitude 10g        | 0.679    | 16.943 | 0.019  | 0.631    | 13.657 | 0.035 |
| Topographic    | Altitude 10q        | 0.700    | 18.677 | 0.016  | 0.671    | 16.336 | 0.018 |
| Topographic    | Altitude 3a         | 0.721    | 20.688 | 0.019  | 0.665    | 15.892 | 0.031 |
| Topographic    | Altitude 3b         | 0.713    | 19.866 | 0.015  | 0.648    | 14.729 | 0.032 |
| Topographic    | Altitude 3c         | 0.697    | 18.373 | 0.018  | 0.621    | 13.121 | 0.031 |
| Ecoregions     | Ecoregions 4        | 0.827    | 38.261 | 0.014  | 0.705    | 19.107 | 0.018 |
| Ecoregions     | Ecoregions 5        | 0.807    | 33.382 | 0.015  | 0.679    | 16.908 | 0.017 |
| Ecoregions     | Ecoregions 6        | 0.636    | 13.959 | 0.017  | 0.649    | 14.848 | 0.017 |
| Ecoregions     | Ecoregions 7        | 0.796    | 31.241 | 0.017  | 0.666    | 15.977 | 0.017 |
| Land cover     | Land cover          | 0.475    | 7.241  | 0.053  | 0.358    | 4.462  | 0.085 |
| Land cover     | Land cover 4        | 0.641    | 14.306 | 0.017  | 0.523    | 8.776  | 0.037 |
| Land cover     | NDVI                | 0.457    | 9.744  | 0.082  | 0.619    | 13.003 | 0.032 |
| Hydrology      | Distance to streams | 0.448    | 6.502  | 0.017  | 0.125    | 1.144  | 0.287 |
| Hydrology      | Streams 2a          | 0.639    | 14.159 | 0.354  | 0.692    | 17.984 | 0.018 |
| Hydrology      | Streams 2b          | 0.628    | 13.479 | 0.0322 | 0.644    | 14.477 | 0.017 |
| Forest         | tree cover          | 0.569    | 10.543 | 0.048  | 0.698    | 18.519 | 0.033 |
| Forest         | Tree cover 3a       | 0.225    | 2.328  | 0.149  | 0.273    | 2.998  | 0.113 |
| Forest         | Tree cover 3b       | 0.446    | 6.441  | 0.067  | 0.519    | 8.649  | 0.049 |
| Forest         | Tree cover 3c       | 0.143    | 1.335  | 0.235  | 0.181    | 1.773  | 0.187 |
| Anthropogenic  | Night lights        | 0.079    | 0.692  | 0.602  | 0.017    | 0.139  | 0.870 |
| Anthropogenic  | Night lights 10     | 0.085    | 0.745  | 0.562  | 0.020    | 0.167  | 0.848 |
| Anthropogenic  | Human footprint     | 0.480    | 7.383  | 0.066  | 0.801    | 32.31  | 0.016 |

**Table S5** – Genetics differentiation ( $F_{ST}$ ) between *Plecotus balensis* populations based on the microsatellite dataset, with  $F_{ST}$  in bottom triangle and Jost's D in top triangle.

|        | Bale-D | Bale-S | Simien | Abune | Guassa |
|--------|--------|--------|--------|-------|--------|
| Bale-D | 0      | 0.013  | 0.267  | 0.221 | 0.275  |
| Bale-S | 0.003  | 0      | 0.259  | 0.175 | 0.243  |
| Simien | 0.078  | 0.074  | 0      | 0.124 | 0.189  |
| Abune  | 0.059  | 0.046  | 0.035  | 0     | 0.103  |
| Guassa | 0.072  | 0.061  | 0.053  | 0.026 | 0      |

**Table S6** – Results of the linear models relating allelic richness (corrected for sample size) and inbreeding (based on TrioML measure) in *Plecotus balensis* populations to land cover variables in 5 km radius around capture sites. Significant results highlighted in bold.

|                 | Allelic richness |              |            |              | Inbreeding     |       |     |       |
|-----------------|------------------|--------------|------------|--------------|----------------|-------|-----|-------|
|                 | R <sup>2</sup>   | F            | df         | P            | R <sup>2</sup> | F     | df  | P     |
| NDVI dry        | 0.357            | 3.221        | 1,3        | 0.171        | 0.317          | 2.856 | 1,3 | 0.189 |
| Human footprint | 0.053            | 0.168        | 1,3        | 0.709        | 0.008          | 0.025 | 1,3 | 0.885 |
| Forest          | 0.215            | 0.427        | 1,3        | 0.560        | 0.039          | 0.122 | 1,3 | 0.751 |
| Arable          | <b>0.717</b>     | <b>10.41</b> | <b>1,3</b> | <b>0.048</b> | 0.193          | 1.956 | 1,3 | 0.256 |



**Table S7** – Results of the MLPE landscape genetics analysis based on Jost’s D measure of genetic differentiation. Table lists the hypotheses tested, the variables included in each model, model support based on AICc and BIC and evidence weights of each model (AICcmin and BICew) and the 95% confidence intervals of variables in the two best supported models. The Hydro-Land hypothesis could not be included in the Jost’s D analysis due to VIF values >4 between NDVI and streams.

| Hypothesis        | Variables           | AICc           | BIC            | AICcmin      | BICew        | 95% CI             |
|-------------------|---------------------|----------------|----------------|--------------|--------------|--------------------|
| <b>Topography</b> | <b>Altitude</b>     | <b>-60.427</b> | <b>-67.216</b> | <b>0.254</b> | <b>0.196</b> | <b>0.015-0.036</b> |
| Land cover        | NDVI                | -53.557        | -60.346        | 0.008        | 0.006        |                    |
| Anthropogenic     | Human footprint     | -53.838        | -60.628        | 0.009        | 0.007        |                    |
| <b>Ecoregions</b> | <b>Ecoregions 4</b> | <b>-62.292</b> | <b>-69.082</b> | <b>0.645</b> | <b>0.499</b> | <b>0.009-0.021</b> |
| Forest            | Tree cover          | -55.502        | -62.292        | 0.022        | 0.017        |                    |
| Hydrology         | Streams 2a          | -57.224        | -64.014        | 0.051        | 0.04         |                    |
| Anthro-Eco        | Human + Ecoregions  | -53.359        | -66.846        | 0.007        | 0.163        |                    |
| Anthro-Topo       | Human + Altitude    | -51.702        | -65.189        | 0.003        | 0.071        |                    |

**Table S8** – Approximate Bayesian computation probability of scenario comparison based on the Logistic approach for different number of closest simulations to the observed data (# sims), showing the probability of each scenario (prob) and range of values (range) for the four tested scenarios.

| # sims | s1 prob | s1 range      | s2 prob | s2 range      | s3 prob | s3 range      | s4 prob | s4 range      |
|--------|---------|---------------|---------|---------------|---------|---------------|---------|---------------|
| 8000   | 0       | [0.000,0.000] | 0.005   | [0.000,0.025] | 0       | [0.000,0.000] | 0.995   | [0.975,1.000] |
| 16000  | 0       | [0.000,0.000] | 0.006   | [0.000,0.021] | 0       | [0.000,0.000] | 0.994   | [0.979,1.000] |
| 24000  | 0       | [0.000,0.000] | 0.011   | [0.000,0.036] | 0       | [0.000,0.000] | 0.989   | [0.964,1.000] |
| 32000  | 0       | [0.000,0.000] | 0.012   | [0.000,0.033] | 0       | [0.000,0.000] | 0.988   | [0.967,1.000] |
| 40000  | 0       | [0.000,0.000] | 0.012   | [0.000,0.031] | 0       | [0.000,0.000] | 0.988   | [0.969,1.000] |

**Table S9** – Parameter estimation based on the best-supported model (scenario 4) in the approximate Bayesian computation model-based inference of the demographic history of *Plecotus balensis* and results of the bias and precession on parameter estimation analysis (MR bias = mean relative bias; RMedAD = relative median absolute deviation). Smaller accuracy values correspond to more precise parameter estimation. See Supplementary Fig. S1 for scenario details.

| <b>Parameter</b>                            | <b>Median</b> | <b>Q5%</b> | <b>Q95%</b> | <b>MR bias</b> | <b>RMedAD</b> |
|---------------------------------------------|---------------|------------|-------------|----------------|---------------|
| Na: current South population size           | 9.70E+03      | 8.52E+03   | 9.97E+03    | 0.18           | 0.31          |
| N2: current North population size           | 9.20E+04      | 2.09E+04   | 5.71E+05    | 0.26           | 0.36          |
| T4: time of South population decline        | 7.66E+01      | 1.48E+01   | 5.57E+02    | 0.29           | 0.42          |
| N1a: past South population size after split | 5.99E+04      | 2.38E+04   | 1.39E+05    | 0.20           | 0.33          |
| T3: time of population split                | 4.48E+04      | 1.75E+04   | 7.77E+04    | 0.44           | 0.43          |

## Supporting Figures

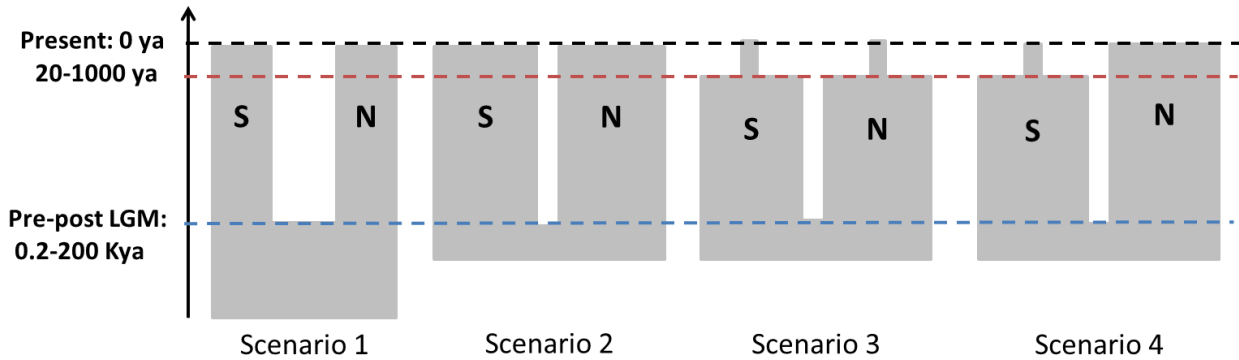

**Figure S1** – The four scenarios compared in the approximate Bayesian computation model-based inference of *Plecotus balensis* demographic history. Width of boxes reflects relative population sizes. S and N denote South and North of Rift Valley populations, respectively. The three timeframes compared in the scenarios are indicated by the dashed lines: blue for population split time (priors set between 200 and 200,000 ya), orange for recent population size changes (priors set between 20 and 1,000 ya), and black for the present time (population sampling time, set as 0 ya).

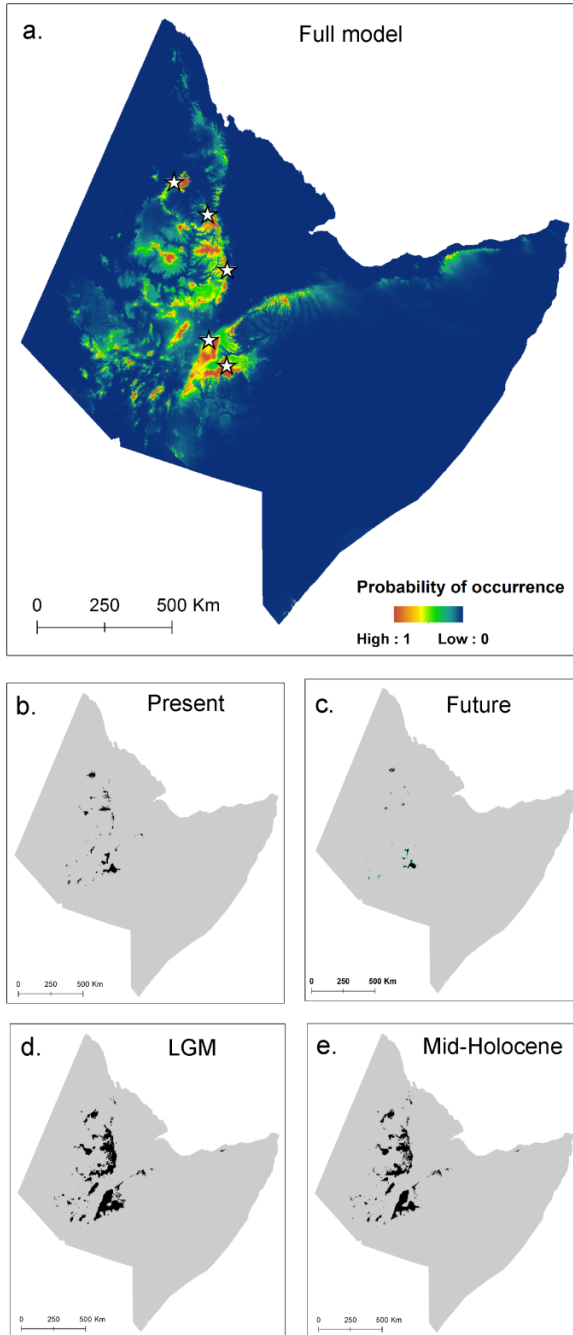

**Fig. S2** – Projected probability of occurrence for *Plecotus balensis* across the horn of Africa based on ecological niche modelling outputs: a) based on the full model (probability of occurrence ranges from high in orange to low in blue; stars denote the location of mountain ranges sampled in this study); b) present climate model; c) future climate model (2070; RCP8.5 in black and RCP4.5 in blue); d) last glacial maximum (LGM) climate model; and e) mid-Holocene climate model. In the climate models black denote suitable areas and grey unsuitable

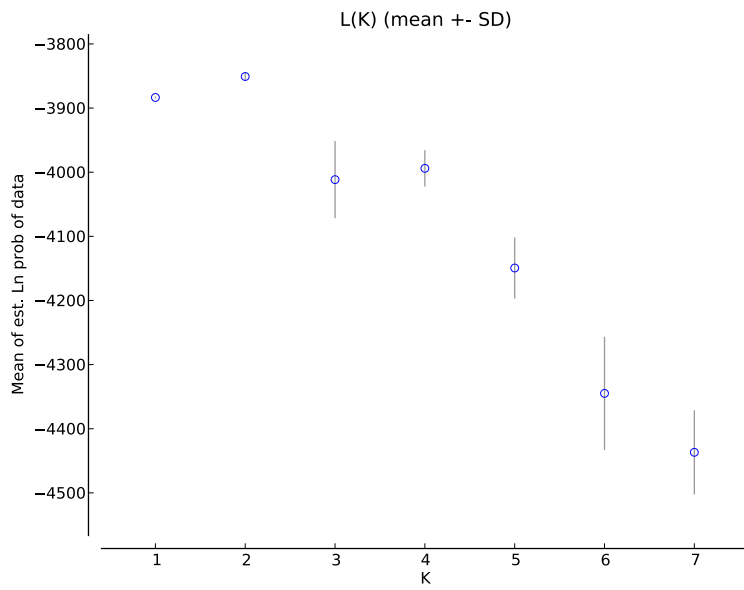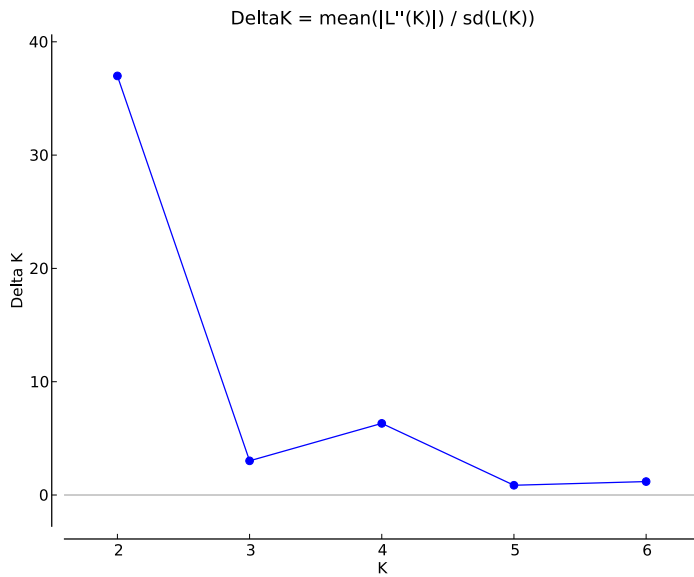

**Fig. S3** – Results of the STRUCTURE analysis showing best supported number of clusters (K) based on the log Likelihood (top) and Evanno’s delta K (bottom) methods. In both cases K=2 received the highest support.

K=2

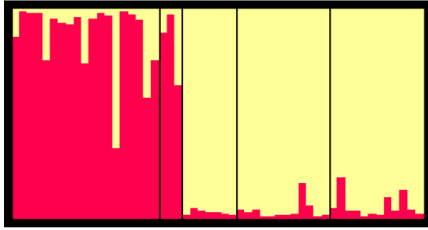

K=3

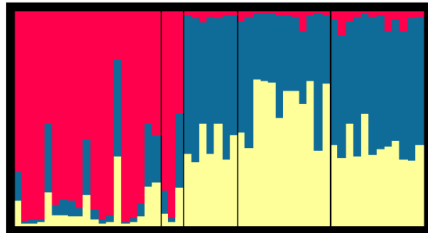

K=4

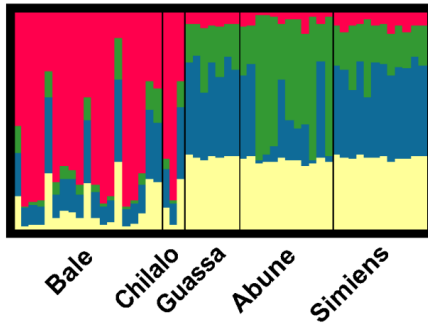

**Figure S4** – Outputs of the Structure analysis showing ancestry of individuals for K = 2-4 population clusters.

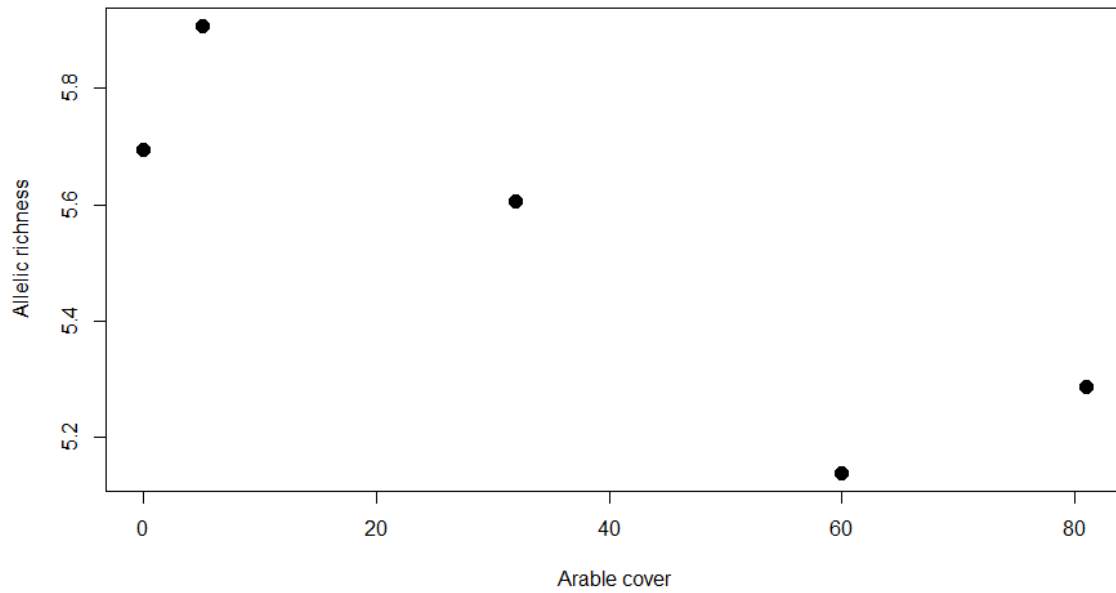

**Figure S5** – The correlation between genetic diversity (allelic richness corrected for sample size) of *Plecotus balensis* populations and the proportion of arable land in 5 km radius around sampling sites.

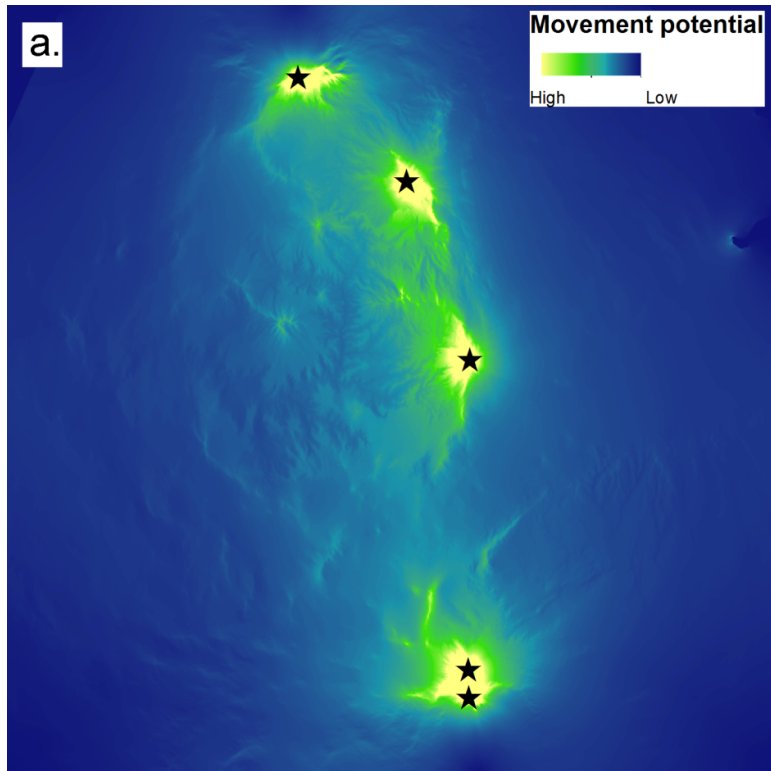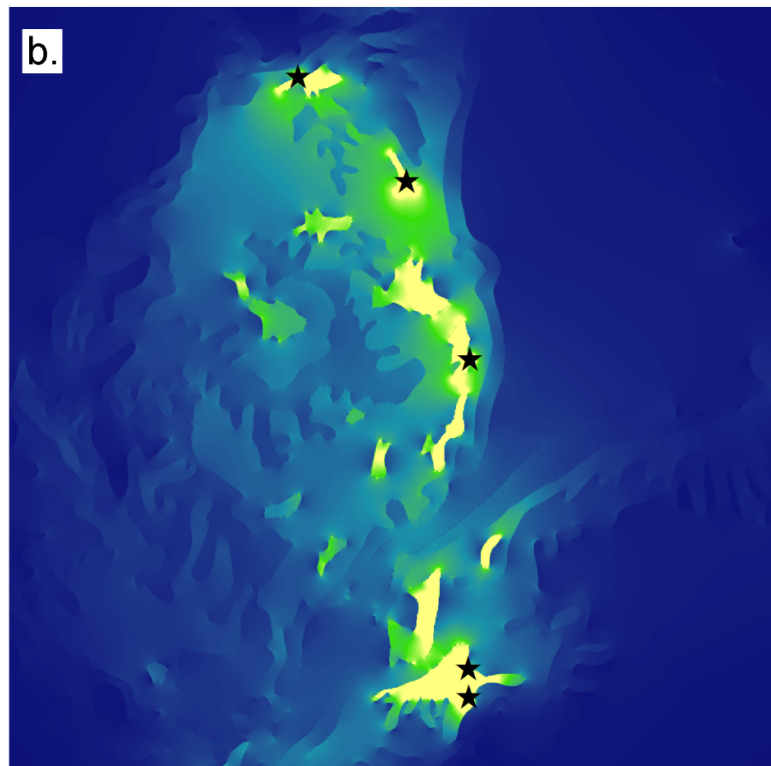

**Figure S6** – Projected movement density based on the effect of altitude (a) and ecoregions (b) on genetic connectivity between *Plecotus balensis* population.



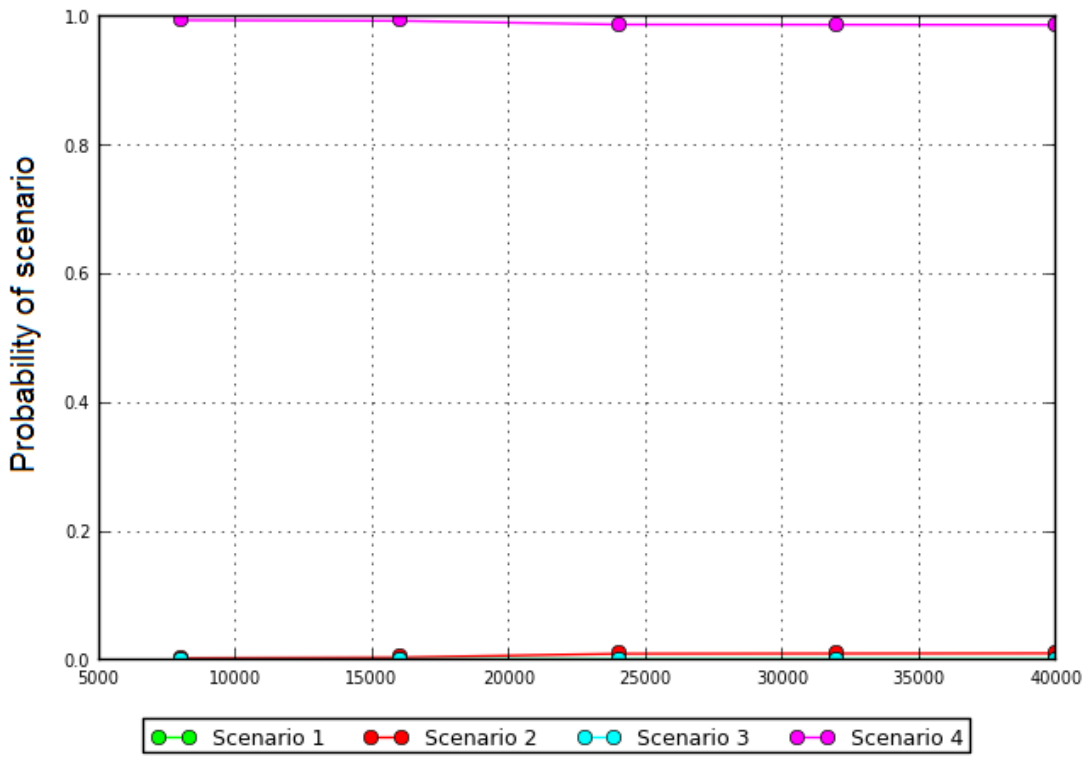

**Figure S7** – Probability of scenarios compared in the approximate Bayesian computation model-based inference of *Plecotus balensis* demographic history. See Fig. B1 for scenario details.

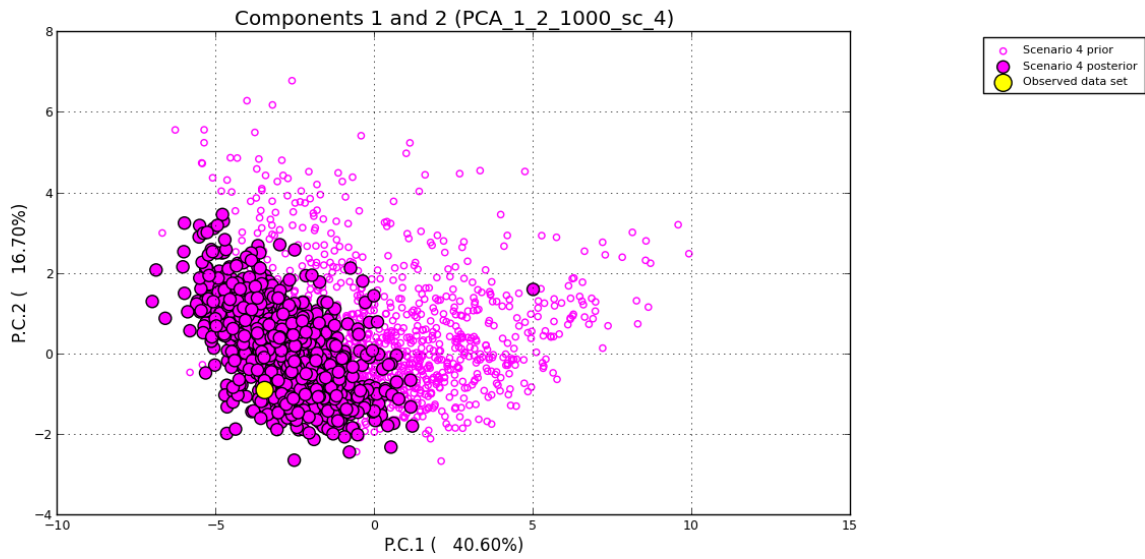

**Figure S8** –DIYABC model checking analysis results for the most probable scenario (scenario 4). PCA plot showing where the observed dataset (yellow dot) falls relative to the simulated dataset generated from posterior parameter distributions (pink dots) and the original scenario 4 prior simulations (open pink circles). The observed dataset falls within the cloud of simulated points, indicating a good fit between observed and simulated datasets under the chosen priors.
